# Supplementary material for: Bilateral Chilblain-like Lesions of the Toes Characterized by Microvascular Remodeling in Adolescents During the COVID-19 Pandemic
Source: PubMed Central journal article supplement (PMC8193438; doi:10.1001/jamanetworkopen.2021.11369), 2021-06-10
Supplement: jamanetwopen-e2111369-s001.pdf [file jamanetwopen-e2111369-s001.pdf]

## Supplementary Online Content

Discepolo V, Catzola A, Pierri L, et al. Bilateral chilblain-like lesions of the toes characterized by microvascular remodeling in adolescents during the COVID-19 pandemic. *JAMA Netw Open*. 2021;4(6):e2111369. doi:10.1001/jamanetworkopen.2021.11369

**eFigure 1.** Heel Involvement and Swelling of the Lesions

**eFigure 2.** Ulceration

**eFigure 3.** Histology of Disease Controls Including Perniosis and Leukocytoclastic Vasculitis

**eFigure 4.** Capillaroscopy

**eTable 1.** Dermoscopy Findings in Patients

**eTable 2.** Laboratory Tests in Patients

**eTable 3.** Histology Findings

**eTable 4.** Capillaroscopy Findings

This supplementary material has been provided by the authors to give readers additional information about their work.

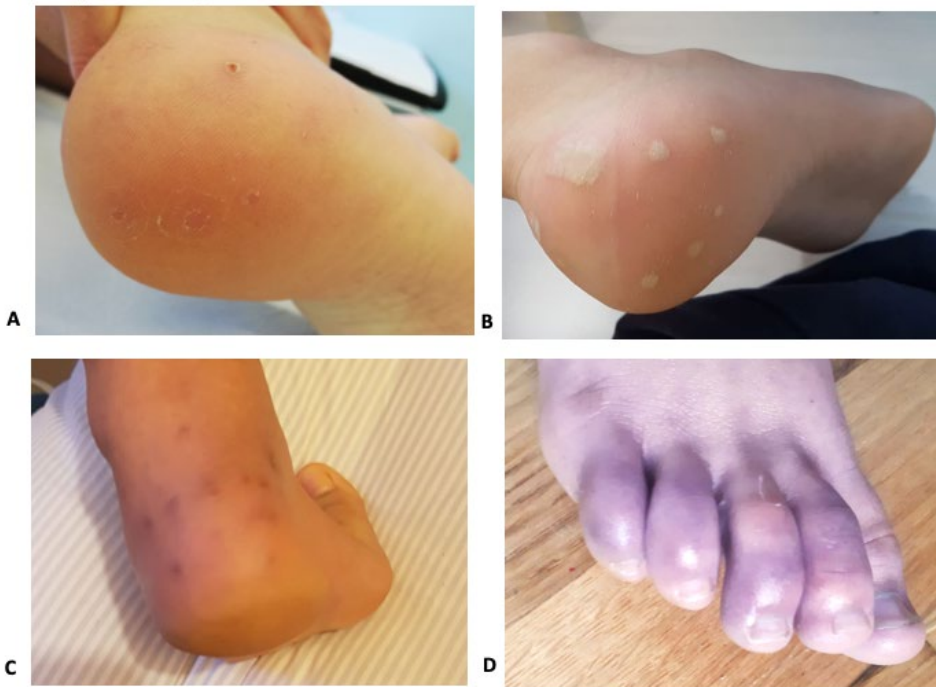

***eFigure 1. Heel involvement and swelling of the toes.*** Lesions localized on the heels characterized few cases (A-C) The evolution of the lesions was characterized by desquamation (B). Swelling of the toes was also commonly reported in our cohort (D).

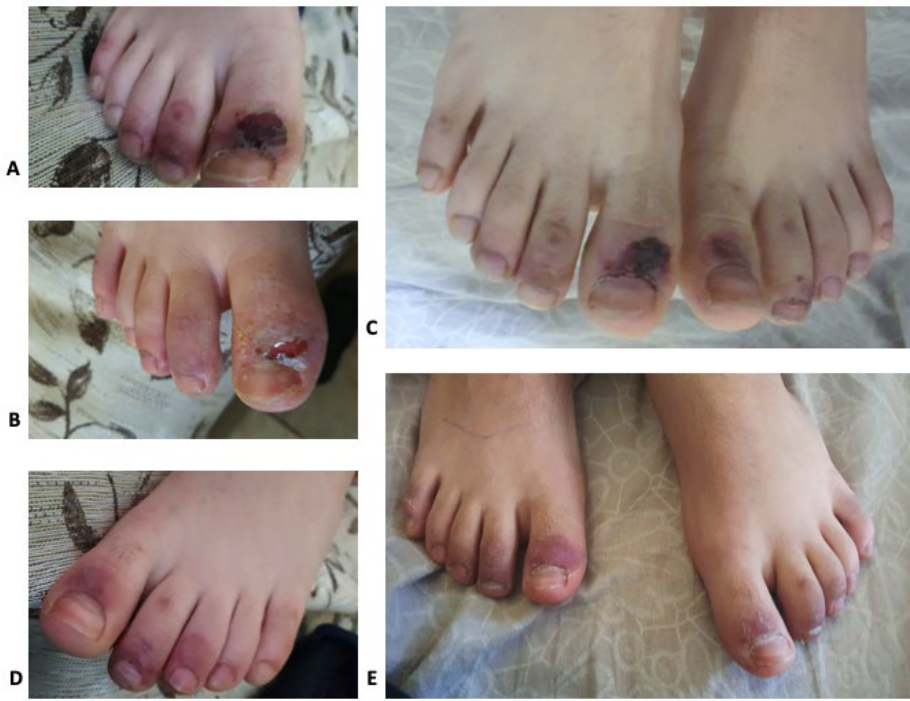

*eFigure 2. Ulceration was a rare complication of the lesions.* One representative case presented with ulceration of the right big toe. Evolution of the lesion over time is presented in the images (A-E).

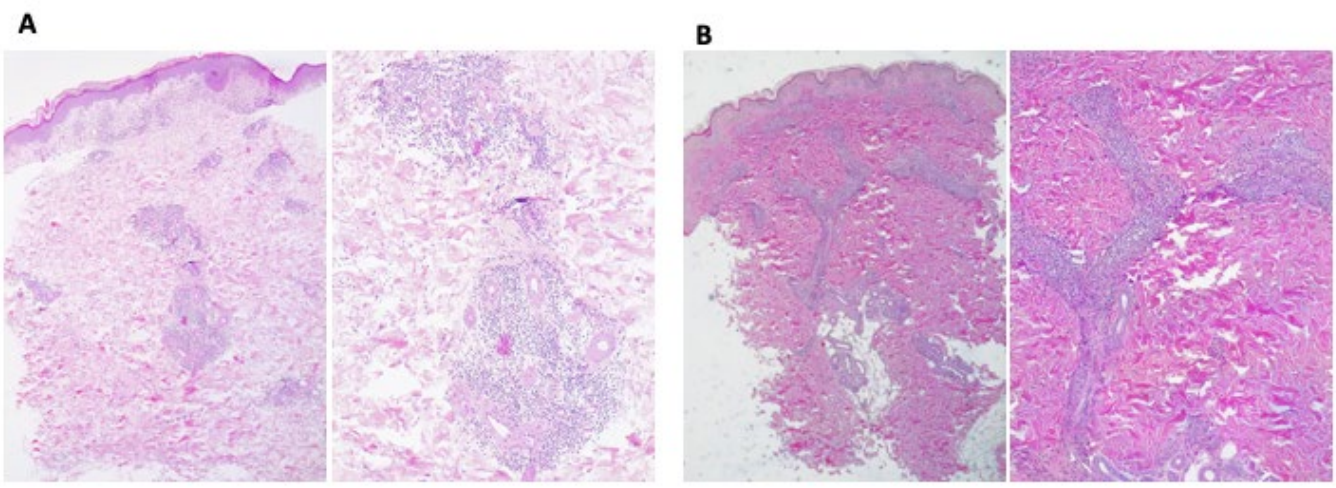

***eFigure 3. Histology of disease controls including perniosis and leukocytoclastic vasculitis.***

Haematoxylin and eosin staining of a representative case of perniosis (A) showing a moderate lymphocytic infiltrate with perivascular and peri-eccrine distribution and of leukocytoclastic vasculitis (B) characterized by an intense neutrophilic infiltrate involving the vessels wall. Original magnification 4X, left images and 10X, right.

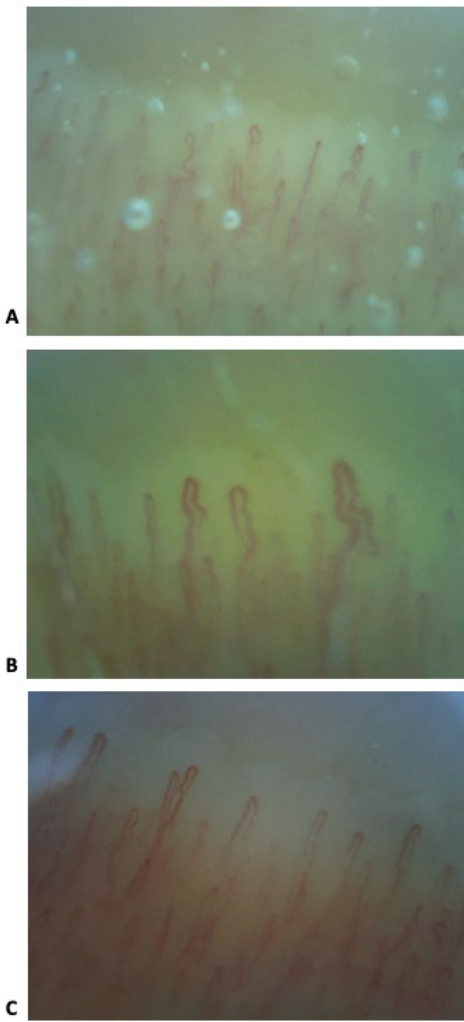

*eFigure 4. Capillaroscopy reveals no systemic inflammatory process.* Videocapillaroscopy images from three representative cases (A-C), showing normal microvascular architecture of the hands in most case or sparse ectasias.

*eTable 1. Dermoscopy findings in patients.*

| Patient Code | Onset to T1 (days) | DERMOSCOPY T1 |          |              |          |       |                       |                           |
|--------------|--------------------|---------------|----------|--------------|----------|-------|-----------------------|---------------------------|
|              |                    | Dermo T1      | Red dots | White streak | Rosettes | Triad | Other pigmented areas | Desquamation              |
| 1            | 13                 | Y             | Y        | Y            | Y        | Y     | Y                     | Y                         |
| 2            | 65                 | Y             | Y        | Y            | Y        | Y     | N                     | N                         |
| 3            | 24                 | Y             | Y        | Y            | Y        | Y     | N                     | N                         |
| 4            | 27                 | Y             | Y        | Y            | Y        | Y     | Y                     | N                         |
| 5            | 31                 | Y             | Y        | N            | Y        | N     | Y                     | N                         |
| 6            | 39                 | Y             | Y        | Y            | N        | N     | Y                     | N                         |
| 7            | 113                | Y             | Y        | N            | Y        | N     | N                     | N                         |
| 8            | 34                 | Y             | Y        | Y            | Y        | Y     | Y                     | N                         |
| 9            | 83                 | Y             | Y        | Y            | Y        | Y     | Y                     | N                         |
| 10           | 52                 | Y             | Y        | Y            | Y        | Y     | Y                     | N                         |
| 11           | 46                 | Y             | Y        | N            | Y        | N     | N                     | Y                         |
| 12           | 45                 | Y             | Y        | N            | N        | N     | N                     | N                         |
| 13           | 57                 | Y             | Y        | Y            | Y        | Y     | Y                     | N                         |
| 14           | 54                 | N             | NA       | NA           | NA       | NA    | NA                    | N                         |
| 15           | 43                 | Y             | Y        | Y            | Y        | Y     | Y                     | N                         |
| 16           | 63                 | Y             | Y        | Y            | Y        | Y     | N                     | N                         |
| 17           | 12                 | Y             | Y        | N            | N        | N     | N                     | N                         |
|              | DERMOSCOPY T2      |               |          |              |          |       |                       |                           |
|              | T1 to T2 (days)    | Dermo T2      | Red dots | White streak | Rosettes | Triad | Other pigmented areas | Time to resolution (days) |
| 1            | 36                 | N             | NA       | NA           | NA       | NA    | NA                    | 49                        |
| 2            | 22                 | N             | NA       | NA           | NA       | NA    | NA                    | 87                        |
| 3            | 25                 | N             | NA       | NA           | NA       | NA    | NA                    | 49                        |
| 4            | 25                 | N             | NA       | NA           | NA       | NA    | NA                    | 52                        |
| 5            | 36                 | N             | NA       | NA           | NA       | NA    | NA                    | 67                        |
| 6            | 36                 | N             | NA       | NA           | NA       | NA    | NA                    | 75                        |
| 7            | 32                 | N             | NA       | NA           | NA       | NA    | NA                    | 145                       |
| 8            | 35                 | N             | NA       | NA           | NA       | NA    | NA                    | 69                        |
| 9            | NA                 | N             | NA       | NA           | NA       | NA    | NA                    | NA                        |
| 10           | 37                 | N             | NA       | NA           | NA       | NA    | NA                    | 89                        |
| 11           | 37                 | Y             | N        | N            | N        | N     | N                     | 83                        |
| 12           | 35                 | Y             | N        | N            | N        | N     | N                     | 80                        |
| 13           | 50                 | N             | NA       | NA           | NA       | NA    | NA                    | 107                       |
| 14           | NA                 | N             | NA       | NA           | NA       | NA    | NA                    | NA                        |
| 15           | 33                 | Y             | N        | N            | N        | N     | 1                     | 76                        |
| 16           | 28                 | Y             | N        | N            | N        | N     | N                     | 91                        |
| 17           | NA                 | N             | N        | N            | N        | N     | N                     | NA                        |

T1, enrollment visit. T2, follow-up visit. Y, yes. N, No. NA, not assessed.

*eTable 2. Laboratory tests in patients.*

| PATIENT CODE            | CBC               |         |         |         |         |                   | INFLAMMATION |           |        |                |             |
|-------------------------|-------------------|---------|---------|---------|---------|-------------------|--------------|-----------|--------|----------------|-------------|
|                         | WBC Cell/ $\mu$ l | N       | L       | M       | E       | PLT Cell/ $\mu$ l | CRP mg/dl    | PCT Ng/ml | ESR mm | Ferritin ng/ml | Ddimer mg/l |
| 1                       | 5250              | 2860    | 1890    | 460     | 30      | 281               | 0.33         | 0.05      | NA     | 28             | 0.09        |
| 2                       | 4980              | 2320    | 2160    | 360     | 110     | 195               | NA           | 0.05      | 20     | 36             | 0.25        |
| 3                       | 5290              | 2760    | 1920    | 430     | 150     | 240               | 0.33         | 0.05      | 8      | 70             | 0.26        |
| 4                       | 6800              | 3290    | 2690    | 460     | 290     | 266               | 0.33         | 0.05      | 10     | 47             | 0.22        |
| 5                       | 8320              | 5050    | 2660    | 440     | 120     | 300               | 0.33         | 0.05      | 10     | 17             | 0.22        |
| 6                       | 7010              | 3040    | 2740    | 430     | 730     | 286               | 0.33         | 0.05      | 18     | 61             | 0.13        |
| 7                       | 4290              | 2390    | 1300    | 480     | 100     | 209               | 0.33         | 0.05      | NA     | 27             | 0.16        |
| 8                       | 4860              | 1720    | 2670    | 380     | 80      | 277               | 0.33         | 0.05      | 7      | 38             | 0.17        |
| 9                       | 6240              | 2510    | 2680    | 310     | 470     | 221               | 0.33         | 0.05      | NA     | 11             | NA          |
| 10                      | 5020              | 1750    | 2810    | 340     | 80      | 258               | 0.33         | 0.05      | NA     | 46             | 0.14        |
| 11                      | 5450              | 2610    | 2340    | 370     | 100     | 264               | 0.33         | 0.05      | 30     | 14             | 0.19        |
| 12                      | 8690              | 3010    | 4520    | 520     | 70      | 247               | 0.33         | 0.05      | 15     | 42             | 0.26        |
| 13                      | 3900              | 2120    | 1400    | 220     | 130     | 233               | 0.33         | 0.05      | 10     | 50             | 0.2         |
| 14                      | 4420              | NA      | NA      | NA      | NA      | 222               | 0.44         | 0.03      | NA     | 63.3           | NA          |
| 15                      | 4500              | 1690    | 2150    | 400     | 210     | 195               | 0.33         | 0.05      | 5      | 24             | 0.12        |
| 16                      | 7380              | 5370    | 1570    | 380     | 30      | 215               | 0.7          | 0.05      | 22     | 28             | 0.38        |
| 17                      | 7990              | 5090    | 2470    | 360     | 30      | 255               | 0.33         | 0.05      | 7      | 52             | 0.24        |
| IMMUNOLOGICAL LAB TESTS |                   |         |         |         |         |                   |              |           |        |                |             |
| PATIENT CODE            | IgG g/l           | IgA g/l | IgM g/l | ICC C1Q | ICC C3d | C3 g/l            | C4 g/l       | ANA       | ENA    |                |             |
| 1                       | 10.1              | 1.09    | 0.97    | 0.67    | 2.49    | <b>1.22</b>       | 0.21         | NEG       | NEG    |                |             |
| 2                       | 10.6              | 2.24    | 0.69    | 1.3     | 2.73    | <b>1.59</b>       | 0.25         | NEG       | NEG    |                |             |
| 3                       | 9.82              | 1.07    | 0.82    | 0.72    | 1.81    | <b>1.36</b>       | 0.21         | NEG       | NEG    |                |             |
| 4                       | 12.6              | 2.33    | 0.84    | 1.81    | 2.41    | <b>1.21</b>       | 0.19         | NEG       | NEG    |                |             |
| 5                       | 10                | 0.78    | 0.74    | 6.3     | 1.2     | <b>1.13</b>       | 0.17         | NEG       | NEG    |                |             |
| 6                       | 9.92              | 3.25    | 1.27    | 2.79    | 2.48    | <b>1.12</b>       | 0.18         | NEG       | NEG    |                |             |
| 7                       | 8.55              | 1.45    | 1.28    | 0.41    | 1.48    | <b>1.15</b>       | 0.19         | NEG       | NEG    |                |             |
| 8                       | 11.7              | 1.8     | 0.5     | NA      | NA      | <b>1.01</b>       | 0.21         | NEG       | NEG    |                |             |
| 9                       | 11.7              | 2.3     | 2.09    | NA      | NA      | <b>1.11</b>       | 0.15         | NEG       | NEG    |                |             |
| 10                      | 12.4              | 1.04    | 3.28    | 1.08    | 1.28    | <b>1.37</b>       | 0.15         | NEG       | NEG    |                |             |
| 11                      | 9.45              | 1.25    | 0.83    | 5.03    | 1.28    | <b>1.08</b>       | 0.11         | NEG       | NEG    |                |             |
| 12                      | 9.57              | 1.75    | 0.38    | 9.53    | 1.98    | <b>1.61</b>       | 0.31         | NEG       | NEG    |                |             |
| 13                      | 10.2              | 0.99    | 0.42    | 0.27    | 0.6     | <b>1</b>          | 0.15         | NEG       | NEG    |                |             |
| 14                      | 6.76              | 2.05    | 0.55    | NA      | NA      | <b>0.97</b>       | 0.2          | NA        | NA     |                |             |
| 15                      | 10.7              | 1.5     | 0.92    | 0.63    | 2.72    | <b>1.37</b>       | 0.15         | NEG       | NEG    |                |             |
| 16                      | 8.79              | 0.95    | 1.74    | 2       | 2.1     | <b>1.07</b>       | 0.15         | NEG       | NEG    |                |             |
| 17                      | 14                | 3.26    | 1.96    | 3.21    | 2.44    | <b>1.59</b>       | 0.3          | NEG       | NEG    |                |             |

WBC, white blood cells. N, neutrophils. L, lymphocytes. M, monocytes. E, eosinophils. PLT, platelets. CRP, C reactive protein. PCT, pro-calcitonin. ESR, Eritrocyte sedimentation rate. Ig, immunoglobulins. ICC, circulating immune complexes. C3, C4 complement fraction 3(normal value g/l 0.51-0.95), 4 (normal value 0.08-0.44). ANA, anti-nuclear antibodies. ENA, extractable nuclear antigens antibodies.

**eTable 3. Histology findings.**

| <b>Patient Code</b> | <b>Onset to T1 (days)</b> | <b>SKIN BIOPSY (Y/N)</b> | <b>Increased number vessels</b> | <b>Lobular organization</b> | <b>Endothelial hyperplasia</b> | <b>Lymphocytic perivascular infiltrate</b> |
|---------------------|---------------------------|--------------------------|---------------------------------|-----------------------------|--------------------------------|--------------------------------------------|
| 1                   | 13                        | N                        | NA                              | NA                          | NA                             | NA                                         |
| 2                   | 65                        | Y                        | Y                               | Y                           | Y                              | Y                                          |
| 3                   | 24                        | N                        | NA                              | NA                          | NA                             | NA                                         |
| 4                   | 27                        | N                        | NA                              | NA                          | NA                             | NA                                         |
| 5                   | 31                        | Y                        | Y                               | Y                           | Y                              | Y                                          |
| 6                   | 39                        | Y                        | Y                               | Y                           | Y                              | Y                                          |
| 7                   | 113                       | Y                        | Y                               | Y                           | Y                              | Y                                          |
| 8                   | 34                        | Y                        | N                               | N                           | Y                              | Y                                          |
| 9                   | 83                        | Y                        | Y                               | Y                           | Y                              | Y                                          |
| 10                  | 52                        | N                        | NA                              | NA                          | NA                             | NA                                         |
| 11                  | 46                        | N                        | NA                              | NA                          | NA                             | NA                                         |
| 12                  | 45                        | Y                        | N                               | Y                           | Y                              | Y                                          |
| 13                  | 57                        | Y                        | N                               | Y                           | Y                              | Y                                          |
| 14                  | 54                        | Y                        | N                               | N                           | Y                              | Y                                          |
| 15                  | 43                        | Y                        | Y                               | Y                           | Y                              | Y                                          |
| 16                  | 63                        | Y                        | Y                               | N                           | N                              | Y                                          |
| 17                  | 12                        | Y                        | N                               | Y                           | Y                              | N                                          |

T1, enrollment visit. T2, follow-up visit. Y, yes. N, No. NA, not assessed.



*eTable 4. Capillaroscopy findings.*

| <b>Patient Code</b> | <b>Vessels ectasia</b> | <b>Winding vessels</b> |
|---------------------|------------------------|------------------------|
| 001                 | rare                   | N                      |
| 002                 | N                      | N                      |
| 003                 | N                      | N                      |
| 004                 | rare                   | N                      |
| 005                 | rare                   | N                      |
| 006                 | frequent               | Y                      |
| 007                 | rare                   | N                      |
| 008                 | rare                   | N                      |
| 009                 | NA                     | NA                     |
| 010                 | N                      | N                      |
| 011                 | N                      | N                      |
| 012                 | rare                   | Y                      |
| 013                 | frequent               | N                      |
| 014                 | NA                     | NA                     |
| 015                 | N                      | N                      |
| 016                 | frequent               | Y                      |
| 017                 | NA                     | NA                     |

Y, yes. N, No. NA, not assessed.
